# Supplementary material for: Metabolomic Markers of Storage Temperature and Time in Pasteurized Milk
Source: MDPI journal article supplement (doi:10.3390/metabo11070419), 2021-06-25
Supplement: s1 [file s1]

## **Supplemental Material**

### **Metabolomic Markers of Storage Temperature and Time in Pasteurized Milk**

Kara M. Edwards<sup>1</sup>, Aishwarya Badiger<sup>1</sup>, Dennis R. Heldman<sup>1</sup>, Matthias S. Klein<sup>1</sup>

<sup>1</sup>Department of Food Science and Technology, The Ohio State University, Columbus, Ohio, USA

## Supplemental Figures

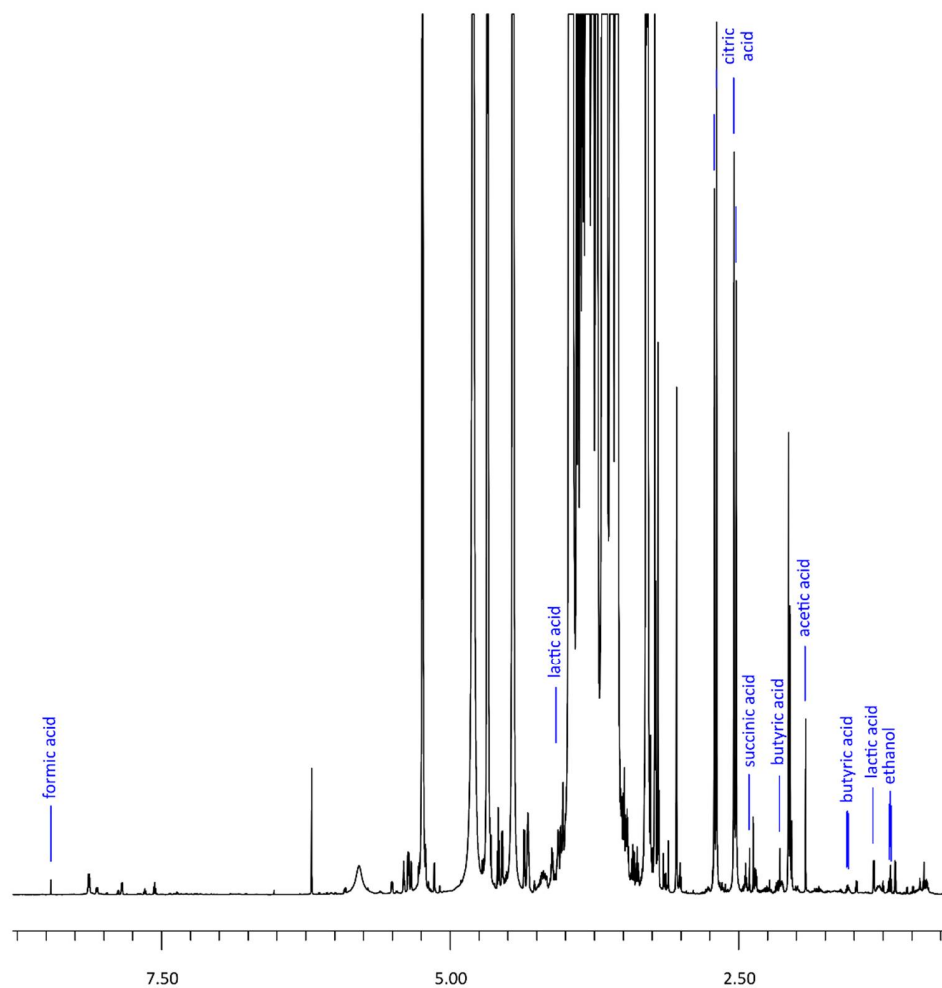

**Figure S1.** Representative one dimensional (1D)  $^1\text{H}$  NOESY spectrum of a milk sample.

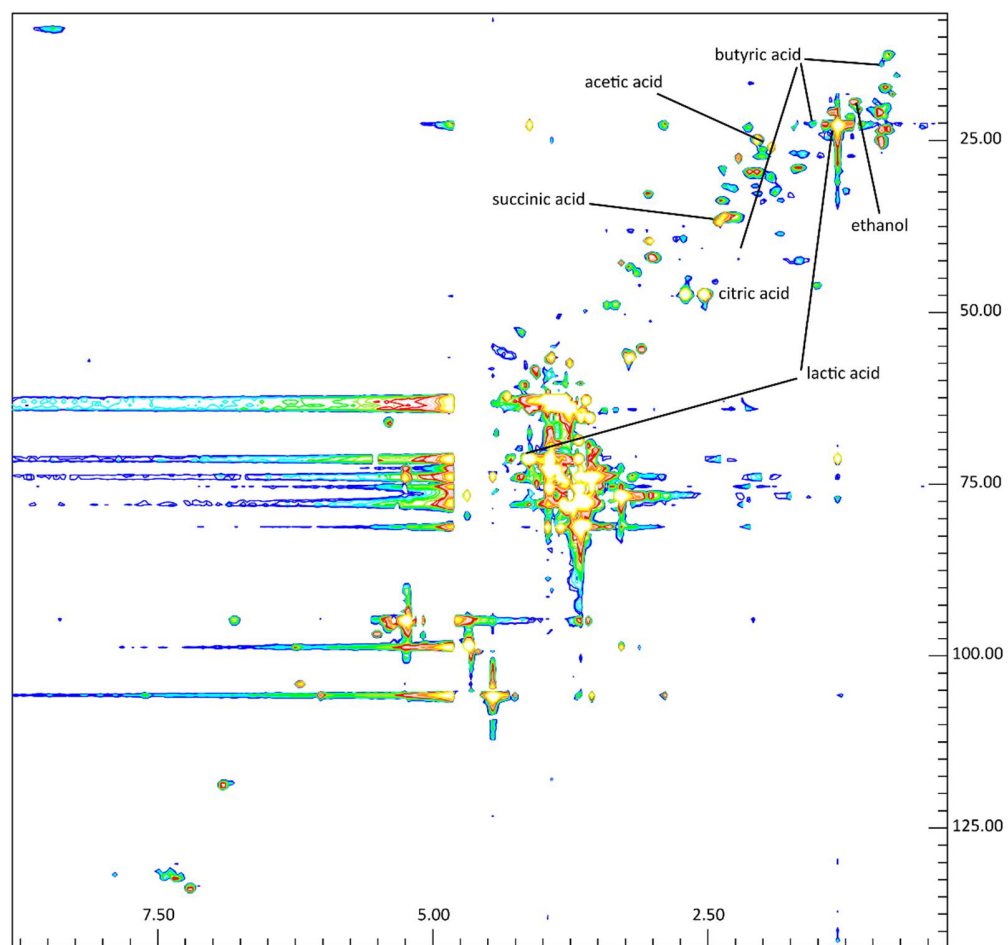

**Figure S2.** Representative two-dimensional (2D)  $^1\text{H}$ - $^{13}\text{C}$  HSQC spectrum of a milk sample.

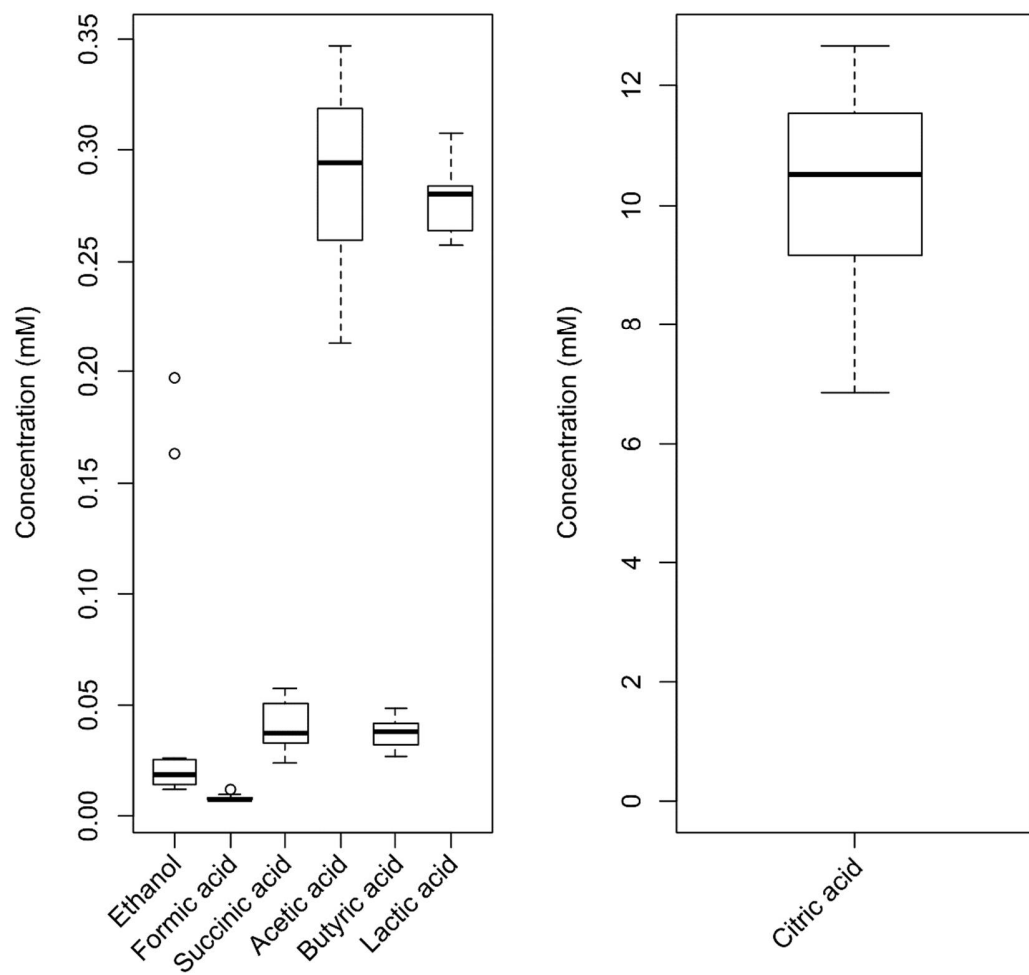

**Figure S3.** Boxplots of initial metabolite concentrations (mM).

## Supplemental Tables

**Table S1.** Replicate, storage temperature (°C), collection time point, storage time (h), and concentrations of all quantified metabolites (mM). NA=not available.

| Replicate | Temperature (°C) | Time point | Storage time (h) | Ethanol | Formic acid | Succinic acid | Citric acid | Acetic acid | Butyric acid | Lactic acid |
|-----------|------------------|------------|------------------|---------|-------------|---------------|-------------|-------------|--------------|-------------|
| 1         | -                | 0          | 0                | 0.0125  | 0.0069      | 0.0286        | 6.8379      | 0.3359      | 0.0400       | 0.2611      |
| 1         | -                | 0          | 0                | 0.0141  | 0.0088      | 0.0336        | 8.4775      | 0.3366      | 0.0356       | 0.2572      |
| 1         | -                | 0          | 0                | 0.0200  | 0.0099      | 0.0389        | 9.9290      | 0.3470      | 0.0383       | 0.2605      |
| 2         | -                | 0          | 0                | 0.0143  | 0.0073      | 0.0463        | NA          | 0.2666      | 0.0314       | 0.2796      |
| 2         | -                | 0          | 0                | 0.0132  | 0.0081      | 0.0521        | 11.5434     | 0.2770      | 0.0332       | 0.2941      |
| 2         | -                | 0          | 0                | NA      | 0.0077      | 0.0559        | 11.4377     | 0.2941      | 0.0292       | 0.2974      |
| 2         | -                | 0          | 0                | 0.0146  | 0.0094      | 0.0577        | 12.6869     | 0.3004      | 0.0269       | 0.3075      |
| 3         | -                | 0          | 0                | 0.1632  | 0.0123      | 0.0327        | 9.1708      | 0.2916      | 0.0272       | 0.2591      |
| 3         | -                | 0          | 0                | 0.1971  | 0.0080      | 0.0362        | 12.0551     | 0.3095      | 0.0344       | 0.2818      |
| 3         | -                | 0          | 0                | NA      | 0.0081      | 0.0499        | 11.1083     | 0.3232      | 0.0383       | 0.2828      |
| 3         | -                | 0          | 0                | NA      | 0.0080      | 0.0526        | 9.5597      | 0.3144      | 0.0394       | 0.2799      |
| 4         | -                | 0          | 0                | 0.0246  | 0.0068      | 0.0239        | 7.3843      | 0.2127      | 0.0436       | 0.2663      |
| 4         | -                | 0          | 0                | 0.0260  | 0.0084      | 0.0299        | 9.7955      | 0.2410      | 0.0483       | 0.2789      |
| 4         | -                | 0          | 0                | 0.0186  | 0.0076      | 0.0377        | 11.5877     | 0.2460      | 0.0447       | 0.2822      |
| 4         | -                | 0          | 0                | 0.0194  | 0.0076      | 0.0370        | 11.3724     | 0.2522      | 0.0474       | 0.2846      |
| 1         | 4                | 1          | 169              | 0.0726  | 0.0076      | 0.0226        | 10.3611     | 0.3334      | 0.0438       | 0.2652      |
| 1         | 4                | 1          | 169              | NA      | 0.0089      | 0.0234        | 7.7470      | 0.3721      | 0.0407       | 0.2744      |
| 1         | 4                | 1          | 169              | 0.0762  | 0.0082      | 0.0253        | 10.2273     | 0.3865      | 0.0436       | 0.2896      |
| 4         | 4                | 1          | 168.1            | NA      | 0.0076      | 0.0202        | 9.2665      | 0.2530      | 0.0520       | 0.2743      |
| 4         | 4                | 1          | 168.1            | 0.0220  | 0.0070      | 0.0210        | 8.7707      | 0.2433      | 0.0565       | 0.2675      |
| 4         | 4                | 1          | 168.1            | 0.0222  | 0.0068      | 0.0213        | 8.7438      | 0.2519      | 0.0508       | 0.2603      |
| 3         | 4                | 2          | 336.7            | 0.2180  | 0.0092      | 0.0188        | 6.5207      | 0.3102      | 0.0571       | 0.2631      |
| 3         | 4                | 2          | 336.7            | 0.2408  | 0.0068      | 0.0182        | 7.0499      | 0.2905      | 0.0522       | 0.2532      |
| 3         | 4                | 2          | 336.7            | 0.0117  | 0.0088      | 0.0222        | 8.3294      | 0.3127      | 0.0550       | 0.2794      |
| 1         | 4                | 3          | 504.2            | 0.0491  | 0.0070      | 0.0163        | 5.8089      | 0.3309      | 0.0536       | 0.2592      |
| 1         | 4                | 3          | 504.2            | 0.0177  | 0.0109      | 0.0243        | 8.0959      | 0.4120      | 0.0763       | 0.3111      |
| 1         | 4                | 3          | 504.2            | 0.1363  | 0.0737      | 0.0434        | 8.1474      | 0.9395      | 0.0619       | 0.4130      |
| 2         | 4                | 3          | 503.6            | 0.0159  | 0.0089      | 0.0306        | 5.7436      | 0.3020      | 0.0520       | 0.2643      |
| 2         | 4                | 3          | 503.6            | 0.0385  | 0.0105      | 0.0366        | 5.5643      | 0.3115      | 0.0526       | 0.2635      |
| 2         | 4                | 3          | 503.6            | 0.0349  | 0.0102      | 0.0229        | NA          | 0.2886      | 0.0569       | 0.2918      |
| 4         | 4                | 3          | 504.2            | NA      | 0.0093      | 0.0217        | 7.8882      | 0.2473      | 0.0720       | 0.2727      |
| 4         | 4                | 3          | 504.2            | 0.0286  | 0.0078      | 0.0210        | 8.2224      | 0.2571      | 0.0775       | 0.2635      |
| 4         | 4                | 3          | 504.2            | NA      | NA          | 0.0921        | 5.1242      | 0.3965      | 0.2142       | 0.6691      |
| 1         | 4                | 4          | 600              | 0.0521  | 0.0085      | 0.0189        | 8.3990      | 0.3668      | 0.0600       | 0.2656      |
| 1         | 4                | 4          | 600              | 0.1002  | 0.1037      | 0.0463        | 5.8215      | 1.0902      | 0.0567       | 0.3684      |
| 1         | 4                | 4          | 600              | NA      | 0.0130      | 0.0873        | 5.3257      | 0.9720      | 0.4086       | NA          |
| 3         | 4                | 4          | 600.5            | 0.0331  | 0.0098      | 0.0176        | 12.0599     | 0.3157      | 0.0607       | 0.2876      |
| 3         | 4                | 4          | 600.5            | 0.2472  | 0.0085      | 0.0162        | 6.5475      | 0.3105      | 0.0589       | 0.2726      |
| 3         | 4                | 4          | 600.5            | 0.0243  | 0.0093      | 0.0173        | 11.1110     | 0.3107      | 0.0574       | 0.2736      |
| 4         | 4                | 4          | 672.2            | NA      | 0.0090      | 0.0216        | 7.9043      | 0.2462      | 0.0736       | 0.2685      |
| 4         | 4                | 4          | 672.2            | NA      | NA          | 0.0444        | 5.3997      | 0.4978      | 0.2980       | NA          |
| 4         | 4                | 4          | 672.2            | NA      | 0.0110      | 0.0764        | 7.2167      | 0.5574      | 0.2953       | NA          |
| 1         | 4                | 5          | 671.1            | 0.0478  | 0.0085      | 0.0162        | 5.4335      | 0.3637      | 0.0716       | 0.2616      |
| 1         | 4                | 5          | 671.1            | NA      | 0.0088      | 0.0178        | 7.0570      | 0.3655      | 0.0739       | 0.2709      |
| 1         | 4                | 5          | 671.1            | 4.1550  | 2.6361      | 2.4362        | 4.3598      | 6.1786      | 0.0799       | 2.1453      |
| 3         | 4                | 5          | 720.2            | 0.1891  | 0.0085      | 0.0229        | 6.6105      | 0.4347      | 0.0843       | 0.2599      |
| 3         | 4                | 5          | 720.2            | 1.4866  | 2.0202      | 0.0471        | 6.9155      | 7.2239      | 0.1052       | 0.3927      |
| 4         | 4                | 5          | 720.5            | NA      | 0.0077      | 0.0194        | 7.6546      | 0.2483      | 0.0843       | 0.2728      |
| 4         | 4                | 5          | 720.5            | NA      | 0.0075      | 0.1123        | NA          | 0.6767      | 0.5535       | NA          |
| 4         | 4                | 5          | 720.5            | 0.0291  | 0.0098      | 0.0189        | 5.2982      | 0.2685      | 0.0840       | 0.2652      |

|   |    |    |        |         |        |         |         |         |         |         |
|---|----|----|--------|---------|--------|---------|---------|---------|---------|---------|
| 1 | 4  | 6  | 743.5  | 0.0589  | 0.0186 | 0.0169  | 5.9602  | 0.5063  | 0.0759  | 0.2692  |
| 1 | 4  | 6  | 743.5  | 0.0506  | 0.0120 | 0.0217  | 7.3314  | 0.5085  | 0.0747  | 0.2828  |
| 1 | 4  | 6  | 743.5  | 0.0272  | 0.0090 | 0.0168  | 6.0774  | 0.3591  | 0.0720  | 0.2414  |
| 2 | 4  | 6  | 839.7  | 0.0196  | 0.0137 | 0.0159  | 5.1773  | 0.2327  | 0.0460  | 0.2973  |
| 2 | 4  | 6  | 839.7  | 0.0176  | 0.0092 | 0.0282  | 3.9289  | 0.3262  | 0.0724  | 0.2669  |
| 2 | 4  | 6  | 839.7  | 0.0603  | 0.0142 | 0.0421  | 7.0415  | 0.4100  | 0.0704  | 0.3182  |
| 2 | 4  | 7  | 1007   | 0.0160  | 0.0163 | 0.0411  | 4.2817  | 0.6471  | 0.0730  | 0.3145  |
| 2 | 4  | 7  | 1007   | 0.0135  | 0.0094 | 0.0256  | 3.9392  | 0.3272  | 0.0727  | 0.2651  |
| 2 | 4  | 7  | 1007   | 0.0991  | 0.0126 | 0.0382  | 6.2997  | 0.4487  | 0.0678  | 0.3116  |
| 3 | 4  | 7  | 1056   | 0.1993  | 0.0102 | 0.0168  | 4.7745  | 0.3088  | 0.0779  | 0.2600  |
| 3 | 4  | 7  | 1056   | 0.2501  | 0.0086 | 0.0159  | 7.6342  | 0.3274  | 0.0857  | 0.2568  |
| 3 | 4  | 7  | 1056   | NA      | 0.0113 | 0.0321  | 7.5862  | 0.3765  | 0.0837  | 0.2742  |
| 4 | 4  | 7  | 1034   | 1.8102  | 3.8219 | 0.1508  | 9.9242  | 17.6027 | 3.2989  | 5.9651  |
| 4 | 4  | 7  | 1034   | 0.0231  | 0.0091 | 0.0158  | 5.6140  | 0.2575  | 0.0924  | 0.2798  |
| 4 | 4  | 7  | 1034   | 1.9824  | 4.4327 | 0.0991  | 2.9031  | 18.5298 | 5.8753  | 8.5462  |
| 1 | 4  | 8  | 886.5  | 0.0126  | 0.0100 | 0.0208  | 7.6907  | 0.3977  | 0.0825  | 0.2773  |
| 1 | 4  | 8  | 886.5  | NA      | 0.3020 | 0.1596  | 6.1402  | 2.6663  | 1.0869  | NA      |
| 1 | 4  | 8  | 886.5  | 0.0269  | 0.0099 | 0.0175  | 4.9091  | 0.3709  | 0.0824  | 0.2772  |
| 2 | 4  | 8  | 1103.8 | 0.0507  | 0.0643 | 0.0492  | 7.9967  | 0.8020  | 0.0910  | 0.2173  |
| 2 | 4  | 8  | 1103.8 | 0.0183  | 0.0273 | 0.0285  | 4.0815  | 0.6302  | 0.0817  | 0.1780  |
| 2 | 4  | 8  | 1103.8 | 0.0368  | 0.0128 | 0.0313  | 6.8583  | 0.5256  | 0.0868  | 0.3512  |
| 4 | 4  | 8  | 1154   | 0.0181  | 0.0096 | 0.0201  | 8.0691  | 0.2513  | 0.0936  | 0.2661  |
| 4 | 4  | 8  | 1154   | 1.0874  | 3.4724 | 0.2037  | NA      | 9.2745  | 5.5010  | 21.2601 |
| 4 | 4  | 8  | 1154   | 0.0588  | 0.0119 | 0.0152  | 5.6192  | 0.3303  | 0.1008  | 0.2757  |
| 1 | 4  | 9  | 960    | NA      | 0.0097 | 0.0201  | 6.6383  | 0.3813  | 0.0710  | 0.2772  |
| 1 | 4  | 9  | 960    | 0.1325  | 0.0096 | 0.0157  | 6.1668  | 0.3579  | 0.0761  | 0.2617  |
| 2 | 4  | 9  | 1224   | 3.1025  | 4.6288 | 0.0661  | 8.9307  | 14.7430 | 0.1307  | 0.8553  |
| 2 | 4  | 9  | 1224   | 0.0624  | 0.1241 | 0.0494  | 5.6936  | 0.9308  | 0.1452  | 0.3175  |
| 2 | 4  | 9  | 1224   | 1.4364  | 3.0297 | 0.2624  | 7.4086  | 26.2802 | 9.7440  | 18.5383 |
| 3 | 4  | 9  | 1367.5 | NA      | 0.0111 | 0.0198  | 8.2053  | 0.4016  | 0.1012  | 0.2817  |
| 3 | 4  | 9  | 1367.5 | 0.0244  | 0.0108 | 0.0210  | 8.9028  | 0.3222  | 0.0979  | 0.2727  |
| 3 | 4  | 9  | 1367.5 | 0.1911  | 0.2666 | 0.0395  | 6.3227  | 2.1045  | 0.1044  | 0.3399  |
| 4 | 4  | 9  | 1273.6 | 0.5014  | 0.3340 | 0.0257  | 6.1080  | 1.4413  | 0.1103  | 0.2939  |
| 4 | 4  | 9  | 1273.6 | 5.1339  | 7.4417 | 0.0721  | 8.2568  | 19.8250 | 0.1503  | 1.9116  |
| 1 | 4  | 10 | 1055.8 | NA      | 0.0095 | 0.0196  | 7.4109  | 0.3299  | 0.0704  | 0.2521  |
| 1 | 4  | 10 | 1055.8 | 0.1373  | 0.0088 | 0.0157  | 6.2041  | 0.3167  | 0.0680  | 0.2754  |
| 1 | 4  | 10 | 1055.8 | 0.0303  | 0.0109 | 0.0173  | 5.2104  | 0.3260  | 0.0771  | 0.2733  |
| 2 | 4  | 10 | 1369.5 | 8.3175  | 8.4152 | 0.1024  | 10.4863 | 21.0472 | 0.3169  | 1.1785  |
| 2 | 4  | 10 | 1369.5 | 0.0223  | 0.0098 | 0.0197  | 6.4999  | 0.3245  | 0.0880  | 0.2633  |
| 2 | 4  | 10 | 1369.5 | 0.1450  | 0.3102 | 0.0575  | 2.7117  | 4.3109  | 0.5897  | 0.9740  |
| 3 | 4  | 10 | 1537.8 | 1.3254  | 1.2000 | 0.0326  | 2.9599  | 6.4540  | 0.1132  | 0.7054  |
| 3 | 4  | 10 | 1537.8 | 0.0282  | 0.0115 | 0.0228  | 8.7863  | 0.6228  | 0.1000  | 0.2770  |
| 3 | 4  | 10 | 1537.8 | 0.0169  | 0.0134 | 0.0299  | 7.2945  | 0.3836  | 0.1056  | 0.2678  |
| 4 | 4  | 10 | 1393.3 | 15.7957 | 5.9601 | 0.3356  | NA      | 34.7287 | 5.9170  | NA      |
| 4 | 4  | 10 | 1393.3 | 3.1723  | 4.0218 | 0.0481  | 4.1279  | 12.7411 | 0.1522  | 0.4163  |
| 4 | 4  | 10 | 1393.3 | 7.1660  | 4.0906 | 0.2793  | NA      | 23.5877 | 7.8198  | 18.3657 |
| 1 | 4  | 11 | 1174.5 | 3.1368  | 4.0518 | 0.1862  | NA      | 18.8897 | 5.4300  | 8.2523  |
| 1 | 4  | 11 | 1174.5 | 4.8946  | 6.3010 | 0.0580  | 5.7262  | 17.1514 | 0.1403  | 1.1639  |
| 1 | 4  | 11 | 1174.5 | 0.0309  | 0.0094 | 0.0170  | 3.3881  | 0.3884  | 0.0957  | 0.2721  |
| 2 | 4  | 11 | 1489.5 | 0.0328  | 0.0179 | 0.0266  | 6.6471  | 0.6735  | 0.0926  | 4.2793  |
| 2 | 4  | 11 | 1489.5 | 0.3401  | 9.6929 | 0.2301  | 7.9192  | 21.5154 | 6.4822  | 53.5149 |
| 2 | 4  | 11 | 1489.5 | 1.4695  | 7.9303 | 0.2744  | 9.2617  | 23.7989 | 5.9131  | 60.2298 |
| 3 | 4  | 11 | 1873.9 | 6.1314  | 6.5416 | 0.1103  | 10.5532 | 31.4425 | 5.1007  | 19.4203 |
| 3 | 4  | 11 | 1873.9 | 5.9240  | 7.1912 | 0.0560  | 3.5190  | 21.8970 | 0.3418  | 5.7273  |
| 3 | 4  | 11 | 1873.9 | 0.3981  | 2.8722 | 0.3820  | 4.9409  | 19.7233 | 10.8194 | 23.9874 |
| 1 | 4  | 12 | 1343   | 2.2031  | 2.8896 | 0.0459  | 5.1471  | 9.0582  | 0.1297  | 0.4196  |
| 1 | 4  | 12 | 1343   | 42.3709 | 9.7090 | 16.6096 | 0.0196  | 6.9920  | 1.0108  | 62.8664 |
| 1 | 4  | 12 | 1343   | 5.8560  | 8.8628 | 0.0549  | 10.5451 | 23.8877 | 0.1665  | 3.8829  |
| 2 | 4  | 12 | 1755   | 1.9917  | 7.2471 | 0.2841  | 7.7853  | 39.4541 | 10.3697 | 44.6040 |
| 2 | 4  | 12 | 1755   | 6.2126  | 7.6093 | 0.0606  | 3.5695  | 26.3286 | 1.0401  | 4.8970  |
| 2 | 4  | 12 | 1755   | 0.5250  | 5.2325 | 0.2448  | 6.7118  | 24.8085 | 8.7831  | 57.1686 |
| 1 | 10 | 1  | 47     | 0.0517  | 0.0106 | 0.0247  | 11.7691 | 0.3491  | 0.0440  | 0.2771  |
| 1 | 10 | 1  | 47     | 0.0479  | 0.0070 | 0.0232  | 10.9632 | 0.3305  | 0.0402  | 0.2706  |

|   |    |   |       |        |        |         |         |         |        |          |
|---|----|---|-------|--------|--------|---------|---------|---------|--------|----------|
| 1 | 10 | 1 | 47    | NA     | 0.0076 | 0.0340  | 8.0499  | 0.3540  | 0.0437 | 0.2704   |
| 2 | 10 | 1 | 47.5  | NA     | 0.0092 | 0.0386  | 7.6208  | 0.2650  | 0.0357 | 0.2601   |
| 2 | 10 | 1 | 47.5  | 0.0401 | 0.0124 | 0.0635  | 12.2938 | 0.3178  | 0.0370 | 0.2999   |
| 2 | 10 | 1 | 47.5  | 0.0146 | 0.0214 | 0.0845  | 10.7899 | 0.3704  | 0.0464 | 0.3853   |
| 4 | 10 | 1 | 48.3  | 0.0182 | 0.0096 | 0.0265  | 12.1101 | 0.2470  | 0.0487 | 0.2916   |
| 4 | 10 | 1 | 48.3  | 0.0203 | 0.0090 | 0.0271  | 9.9559  | 0.2544  | 0.0467 | 0.2771   |
| 4 | 10 | 1 | 48.3  | NA     | 0.0088 | 0.0261  | 12.1414 | 0.2413  | 0.0517 | 0.3079   |
| 2 | 10 | 2 | 95.5  | 0.0505 | 0.0093 | 0.0417  | 11.4789 | 0.3097  | 0.0418 | 0.2892   |
| 2 | 10 | 2 | 95.5  | 0.0162 | 0.0121 | 0.0381  | 8.4182  | 0.3302  | 0.0393 | 0.2871   |
| 2 | 10 | 2 | 95.5  | 0.0119 | 0.0088 | 0.0418  | 7.9594  | 0.2956  | 0.0400 | 0.2695   |
| 3 | 10 | 2 | 96.5  | 0.1518 | 0.0095 | 0.0247  | 9.8704  | 0.3060  | 0.0433 | 0.2647   |
| 3 | 10 | 2 | 96.5  | 0.2324 | 0.0079 | 0.0212  | 7.6277  | 0.3035  | 0.0386 | 0.2774   |
| 3 | 10 | 2 | 96.5  | 0.0097 | 0.0081 | 0.0238  | 8.1114  | 0.2986  | 0.0417 | 0.2647   |
| 1 | 10 | 3 | 144.1 | 0.0509 | 0.0092 | 0.0173  | 10.7433 | 0.3509  | 0.0485 | 0.2825   |
| 1 | 10 | 3 | 144.1 | 0.0540 | 0.0086 | 0.0187  | 10.7938 | 0.3491  | 0.0461 | 0.2852   |
| 1 | 10 | 3 | 144.1 | 0.0173 | 0.0087 | 0.0269  | 7.8565  | 0.3914  | 0.0535 | 0.2937   |
| 2 | 10 | 3 | 143.7 | 0.0285 | 0.0115 | 0.0453  | 10.4603 | 0.3239  | 0.0429 | 0.3259   |
| 2 | 10 | 3 | 143.7 | NA     | 0.0131 | 0.0621  | 6.7291  | 0.3429  | 0.0443 | 0.2893   |
| 2 | 10 | 3 | 143.7 | 0.0523 | 0.0103 | 0.0371  | 12.0538 | 0.3309  | 0.0406 | 0.3037   |
| 4 | 10 | 3 | 146   | 0.0160 | 0.0027 | 0.0144  | 7.1623  | 0.3004  | 0.0500 | 0.2122   |
| 4 | 10 | 3 | 146   | 0.0262 | 0.0023 | 0.0148  | 5.2960  | 0.3227  | 0.0500 | 0.2137   |
| 4 | 10 | 3 | 146   | 0.0262 | 0.0015 | 0.0156  | 11.0630 | 0.3002  | 0.0495 | 0.2199   |
| 2 | 10 | 4 | 191.5 | 0.0978 | 0.0111 | 0.0428  | 7.4584  | 0.3340  | 0.0476 | 0.2846   |
| 2 | 10 | 4 | 191.5 | 0.0147 | 0.0106 | 0.0367  | 7.4121  | 0.3614  | 0.0479 | 0.2847   |
| 2 | 10 | 4 | 191.5 | 0.0173 | 0.0108 | 0.0288  | 6.5067  | 0.2979  | 0.0416 | 0.2644   |
| 4 | 10 | 4 | 192.2 | NA     | 0.0084 | 0.0182  | 7.5137  | 0.2422  | 0.0533 | 0.3001   |
| 4 | 10 | 4 | 192.2 | NA     | 0.0026 | 0.0266  | 4.7357  | 0.5462  | 0.2175 | NA       |
| 4 | 10 | 4 | 192.2 | 0.0485 | 0.0092 | 0.0181  | 10.6959 | 0.2502  | 0.0553 | 0.2867   |
| 1 | 10 | 5 | 239   | 1.5933 | 1.6212 | 0.5846  | 4.7872  | 7.4741  | 0.0566 | 1.6593   |
| 1 | 10 | 5 | 239   | 0.0523 | 0.0090 | 0.0176  | 11.0633 | 0.5051  | 0.0563 | 0.2833   |
| 1 | 10 | 5 | 239   | NA     | 0.0171 | 0.0529  | 8.8222  | 0.8917  | 0.2131 | 0.9450   |
| 2 | 10 | 5 | 239.5 | 0.0575 | 0.0115 | 0.0447  | 6.2327  | 0.7648  | 0.0453 | 0.2797   |
| 2 | 10 | 5 | 239.5 | 0.0177 | 0.0181 | 0.0506  | 7.8895  | 0.3967  | 0.0551 | 0.3250   |
| 2 | 10 | 5 | 239.5 | 0.0157 | 0.0137 | 0.0349  | 6.4648  | 0.5909  | 0.0484 | 0.2708   |
| 2 | 10 | 6 | 264.5 | 0.0375 | 0.0393 | 0.0334  | 6.5510  | 0.7461  | 0.0516 | 0.2847   |
| 2 | 10 | 6 | 264.5 | NA     | 0.0110 | 0.0312  | 6.5747  | 0.5766  | 0.0649 | 0.2827   |
| 2 | 10 | 6 | 264.5 | 0.2993 | 0.4860 | 0.0283  | 10.4715 | 2.6964  | 0.0516 | 0.4882   |
| 3 | 10 | 6 | 264.5 | 0.5487 | 0.5060 | 0.0331  | 4.4801  | 3.8112  | 0.0608 | 2.4363   |
| 3 | 10 | 6 | 264.5 | 0.2177 | 0.0098 | 0.0166  | 6.8192  | 0.3096  | 0.0530 | 0.2681   |
| 3 | 10 | 6 | 264.5 | 0.2397 | 0.3545 | 0.0283  | 7.0860  | 3.1460  | 0.0563 | 2.0405   |
| 4 | 10 | 6 | 275.5 | NA     | 0.2321 | 0.0836  | 7.4099  | 1.4631  | 0.2218 | NA       |
| 4 | 10 | 6 | 275.5 | 0.0988 | 0.1719 | 0.0200  | 9.4073  | 1.6655  | 0.0614 | 0.3528   |
| 4 | 10 | 6 | 275.5 | NA     | 0.0131 | 0.0464  | 7.1131  | 0.7021  | 0.4027 | NA       |
| 1 | 10 | 7 | 288   | 1.1936 | 1.4049 | 0.0340  | 10.2120 | 5.3418  | 0.0531 | 0.4887   |
| 1 | 10 | 7 | 288   | 0.0120 | 0.0109 | 0.0277  | 6.9596  | 0.3584  | 0.0628 | 0.2798   |
| 1 | 10 | 7 | 288   | 4.4022 | 3.4816 | 1.7770  | 3.4099  | 8.3313  | 0.0713 | 1.9204   |
| 2 | 10 | 7 | 288.5 | 0.6128 | 0.8989 | 0.0354  | 5.9804  | 4.0807  | 0.0544 | 0.4473   |
| 2 | 10 | 7 | 288.5 | 0.7585 | 0.9015 | 0.3389  | 11.6003 | 5.4812  | 0.0622 | 308.2861 |
| 2 | 10 | 7 | 288.5 | 0.6974 | 0.8790 | 0.0473  | 5.9631  | 4.1938  | 0.0539 | 0.4169   |
| 3 | 10 | 7 | 288.1 | 0.5570 | 0.5426 | 0.0368  | 6.8016  | 4.1688  | 0.0662 | 2.5556   |
| 3 | 10 | 7 | 288.1 | 0.1993 | 0.0098 | 0.0152  | 6.2962  | 0.2812  | 0.0566 | 0.2723   |
| 3 | 10 | 7 | 288.1 | 0.0157 | 0.0143 | 0.0233  | 8.9721  | 0.3653  | 0.0565 | 0.3511   |
| 4 | 10 | 7 | 288.6 | 0.4484 | 0.7165 | 0.0232  | 7.3472  | 3.2642  | 0.0630 | 0.4204   |
| 4 | 10 | 7 | 288.6 | 0.1353 | 0.1306 | 0.0223  | 3.9552  | 1.9913  | 0.2446 | 0.4799   |
| 4 | 10 | 7 | 288.6 | NA     | 0.0042 | 0.0347  | 6.4519  | 1.7907  | 0.2789 | NA       |
| 1 | 10 | 8 | 311.2 | 0.0244 | 0.0115 | 0.0202  | 4.9261  | 0.1691  | 0.0546 | 0.2976   |
| 1 | 10 | 8 | 311.2 | 1.1944 | 1.2590 | 0.0324  | 5.1460  | 5.0474  | 0.0513 | 0.5862   |
| 1 | 10 | 8 | 311.2 | 1.4659 | 1.6253 | 0.0451  | 5.1035  | 5.8989  | 0.0698 | 0.4865   |
| 2 | 10 | 8 | 311.5 | 1.3405 | 1.5315 | 0.0625  | 5.8681  | 6.0256  | 0.0614 | 0.3573   |
| 2 | 10 | 8 | 311.5 | 1.2634 | 1.2740 | 0.0451  | 7.7765  | 6.9729  | 0.0587 | 2.5943   |
| 2 | 10 | 8 | 311.5 | 1.9274 | 1.9472 | 10.0131 | 0.1072  | 80.6290 | 0.0542 | 10.4399  |
| 3 | 10 | 8 | 313.5 | 0.2190 | 0.0101 | 0.0162  | 5.0605  | 0.3289  | 0.0561 | 0.2641   |
| 3 | 10 | 8 | 313.5 | 0.5236 | 0.6737 | 0.0248  | 7.5908  | 2.4176  | 0.0507 | 0.3209   |

|   |    |    |       |         |        |        |         |         |        |          |
|---|----|----|-------|---------|--------|--------|---------|---------|--------|----------|
| 3 | 10 | 8  | 313.5 | 0.0189  | 0.0132 | 0.0373 | 6.6635  | 0.3528  | 0.0676 | 0.2827   |
| 4 | 10 | 8  | 313.2 | 1.4577  | 1.8326 | 0.0289 | 5.5953  | 6.5812  | 0.0593 | 0.5991   |
| 4 | 10 | 8  | 313.2 | 1.3251  | 1.7070 | 0.0781 | NA      | 6.9124  | 0.9653 | NA       |
| 4 | 10 | 8  | 313.2 | 0.5713  | 0.5522 | 0.1037 | 5.7770  | 2.1333  | 0.0739 | 0.9199   |
| 1 | 10 | 9  | 336.6 | 1.6650  | 1.7144 | 0.0437 | 10.1745 | 6.4945  | 0.0621 | 0.6784   |
| 1 | 10 | 9  | 336.6 | 2.5286  | 2.2740 | 0.0761 | 5.6609  | 7.5720  | 0.0627 | 0.4356   |
| 2 | 10 | 9  | 336.7 | 0.8964  | 0.8436 | 0.2819 | 10.1644 | 4.1315  | 0.9337 | 262.3336 |
| 2 | 10 | 9  | 336.7 | 1.5947  | 1.4721 | 0.0426 | 4.1970  | 5.6157  | 0.0537 | 0.4804   |
| 2 | 10 | 9  | 336.7 | 0.7587  | 0.8825 | 0.3108 | 11.8852 | 5.6365  | 0.0578 | 301.4754 |
| 3 | 10 | 9  | 335.6 | 2.3050  | 2.0725 | 0.0440 | 4.6128  | 7.0203  | 0.0632 | 0.5207   |
| 3 | 10 | 9  | 335.6 | 0.9627  | 1.2031 | 0.0247 | 8.1894  | 3.8720  | 0.1291 | 0.1986   |
| 3 | 10 | 9  | 335.6 | 0.6532  | 0.7214 | 0.0235 | 5.8638  | 3.7434  | 0.0672 | 0.5713   |
| 4 | 10 | 9  | 337.1 | 1.4598  | 1.7131 | 0.0294 | 5.8255  | 6.2523  | 0.0719 | 0.6205   |
| 4 | 10 | 9  | 337.1 | 1.5673  | 1.5365 | 0.0318 | 10.8274 | 5.6084  | 0.0541 | 0.4190   |
| 4 | 10 | 9  | 337.1 | 2.1146  | 1.8787 | 0.1117 | 6.0499  | 6.9552  | 0.7998 | NA       |
| 1 | 10 | 10 | 359   | 26.3722 | 9.4241 | 2.8609 | NA      | 11.7403 | 0.2380 | 5.1169   |
| 1 | 10 | 10 | 359   | 2.8081  | 2.5484 | 0.0774 | 6.1033  | 7.7695  | 0.0689 | 0.4916   |
| 1 | 10 | 10 | 359   | 2.4894  | 2.2228 | 0.0555 | 4.2890  | 7.7040  | 0.0644 | 0.5116   |
| 3 | 10 | 10 | 359.7 | 2.0605  | 2.0493 | 0.0473 | 10.6569 | 7.0151  | 0.0654 | 0.8741   |
| 3 | 10 | 10 | 359.7 | 2.1564  | 1.7988 | 0.0407 | 3.4376  | 6.6024  | 0.0516 | 0.6327   |
| 3 | 10 | 10 | 359.7 | 0.0129  | 0.0088 | 0.0277 | 8.3796  | 0.1195  | 0.0750 | 0.2884   |
| 4 | 10 | 10 | 360.5 | 2.2845  | 2.1068 | 0.0425 | 5.6600  | 6.5367  | 0.0729 | 0.6676   |
| 4 | 10 | 10 | 360.5 | 2.7781  | 3.0264 | 0.0911 | 2.8358  | 13.7964 | 1.3235 | 1.5116   |
| 4 | 10 | 10 | 360.5 | 2.2939  | 2.1025 | 0.1052 | 5.2189  | 8.0450  | 0.7969 | NA       |
| 1 | 10 | 11 | 382.9 | 3.4250  | 2.9287 | 0.0560 | 2.3127  | 9.4580  | 0.0730 | 0.8552   |
| 1 | 10 | 11 | 382.9 | 11.4386 | 5.0381 | 4.6850 | 1.4485  | 0.7837  | 0.2086 | 2.5120   |
| 1 | 10 | 11 | 382.9 | 2.2257  | 1.8824 | 0.0572 | 2.1603  | 6.1983  | 0.0634 | 0.4238   |
| 3 | 10 | 11 | 408   | 5.0337  | 3.9449 | 0.1171 | 1.4314  | 10.8233 | 0.0718 | 0.5698   |
| 3 | 10 | 11 | 408   | 3.8608  | 2.3935 | 0.0813 | 4.5348  | 5.0079  | 0.1374 | 0.2168   |
| 3 | 10 | 11 | 408   | NA      | 0.0120 | 0.0526 | 6.7469  | 0.1966  | 0.0674 | 0.2672   |
| 2 | 15 | 1  | 23.6  | 0.0094  | 0.0099 | 0.0534 | 12.6178 | 0.3019  | 0.0379 | 0.3754   |
| 2 | 15 | 1  | 23.6  | 0.0121  | 0.0112 | 0.0874 | 10.5465 | 0.3219  | 0.0352 | 0.3196   |
| 2 | 15 | 1  | 23.6  | 0.0369  | 0.0124 | 0.0615 | 10.3415 | 0.3077  | 0.0379 | 0.2934   |
| 3 | 15 | 1  | 23.5  | 0.2083  | 0.0101 | 0.0337 | 12.1519 | 0.3288  | 0.0395 | 0.2912   |
| 3 | 15 | 1  | 23.5  | 0.0090  | 0.0081 | 0.0312 | 8.8048  | 0.3028  | 0.0374 | 0.2792   |
| 3 | 15 | 1  | 23.5  | 0.1232  | 0.0071 | 0.0220 | 10.3379 | 0.2872  | 0.0394 | 0.2755   |
| 4 | 15 | 1  | 24.1  | 0.0190  | 0.0103 | 0.0315 | 10.2161 | 0.2760  | 0.0472 | 0.2746   |
| 4 | 15 | 1  | 24.1  | NA      | 0.0091 | 0.0274 | 10.0738 | 0.2495  | 0.0471 | 0.2824   |
| 4 | 15 | 1  | 24.1  | 0.0180  | 0.0086 | 0.0321 | 11.1905 | 0.2664  | 0.0464 | 0.2860   |
| 1 | 15 | 2  | 47    | 0.0133  | 0.0087 | 0.0331 | 7.3660  | 0.3701  | 0.0465 | 0.2923   |
| 1 | 15 | 2  | 47    | 0.0719  | 0.0076 | 0.0234 | 11.7237 | 0.3423  | 0.0448 | 0.2758   |
| 1 | 15 | 2  | 47    | 0.0405  | 0.0079 | 0.0238 | 11.7566 | 0.3449  | 0.0422 | 0.2769   |
| 2 | 15 | 3  | 71.5  | 0.0146  | 0.0100 | 0.0387 | 7.5081  | 0.4995  | 0.0414 | 0.2914   |
| 2 | 15 | 3  | 71.5  | 0.0098  | 0.0100 | 0.0409 | 12.3695 | 0.4289  | 0.0414 | 0.3037   |
| 2 | 15 | 3  | 71.5  | 0.0501  | 0.0102 | 0.0490 | 7.0156  | 0.3404  | 0.0408 | 0.2867   |
| 3 | 15 | 3  | 71.5  | 0.1241  | 0.0082 | 0.0210 | 9.6397  | 0.3679  | 0.0370 | 0.2451   |
| 3 | 15 | 3  | 71.5  | 0.0197  | 0.0086 | 0.0245 | 8.5119  | 0.6080  | 0.0421 | 0.2781   |
| 3 | 15 | 3  | 71.5  | 0.2505  | 0.0082 | 0.0204 | 7.7391  | 0.4942  | 0.0449 | 0.2718   |
| 4 | 15 | 3  | 73    | 0.0251  | 0.0040 | 0.0177 | 11.8524 | 0.3951  | 0.0406 | 0.3554   |
| 4 | 15 | 3  | 73    | NA      | NA     | 0.0157 | 7.7695  | 0.2645  | 0.0429 | 0.2229   |
| 4 | 15 | 3  | 73    | 0.0203  | 0.0035 | 0.0185 | 7.8608  | 0.3350  | 0.0450 | 0.2710   |
| 1 | 15 | 4  | 79    | 0.0109  | 0.0084 | 0.0255 | 7.4195  | 0.4047  | 0.0478 | 0.2680   |
| 1 | 15 | 4  | 79    | 0.0265  | 0.0102 | 0.0254 | 12.0001 | 0.4257  | 0.0521 | 0.3048   |
| 1 | 15 | 4  | 79    | 0.0387  | 0.0095 | 0.0215 | 12.0251 | 0.5018  | 0.0483 | 0.2898   |
| 2 | 15 | 4  | 79.4  | NA      | 0.0113 | 0.0413 | 12.0945 | 0.3241  | 0.0411 | 0.3159   |
| 2 | 15 | 4  | 79.4  | 0.0103  | 0.0136 | 0.0627 | 9.9836  | 0.7232  | 0.0425 | 0.2885   |
| 2 | 15 | 4  | 79.4  | 0.0955  | 0.0655 | 0.0849 | 8.8200  | 2.2791  | 0.0436 | 11.5702  |
| 3 | 15 | 4  | 79.6  | 0.0483  | 0.0795 | 0.0338 | 7.9925  | 1.8123  | 0.0432 | 1.1329   |
| 3 | 15 | 4  | 79.6  | 0.2303  | 0.0077 | 0.0184 | 6.0704  | 0.5167  | 0.1018 | 0.4066   |
| 3 | 15 | 4  | 79.6  | NA      | 0.0122 | 0.0460 | 6.9059  | 0.5279  | 0.0450 | 0.2741   |
| 4 | 15 | 4  | 79.7  | 0.0291  | 0.0186 | 0.0227 | 11.8764 | 0.8565  | 0.0541 | 0.4947   |
| 4 | 15 | 4  | 79.7  | 0.0722  | 0.1026 | 0.0268 | 7.3186  | 1.7485  | 0.0533 | 1.4132   |
| 4 | 15 | 4  | 79.7  | 0.0508  | 0.0600 | 0.0257 | 5.8035  | 1.4343  | 0.0564 | 0.9809   |



|   |    |    |       |        |        |        |         |        |        |          |
|---|----|----|-------|--------|--------|--------|---------|--------|--------|----------|
| 2 | 15 | 5  | 91.7  | 0.0452 | 0.0559 | 0.0738 | 6.0576  | 1.2077 | 0.0456 | 1.1648   |
| 2 | 15 | 5  | 91.7  | 0.0835 | 0.0641 | 0.0505 | 12.0422 | 1.7509 | 0.0443 | 1.3626   |
| 2 | 15 | 5  | 91.7  | 0.0361 | 0.0132 | 0.0497 | 6.7193  | 0.7786 | 0.0421 | 1.2497   |
| 3 | 15 | 5  | 91.5  | 0.2637 | 0.1065 | 0.0389 | 10.5241 | 2.2072 | 0.0472 | 1.5963   |
| 3 | 15 | 5  | 91.5  | 0.0215 | 0.0234 | 0.0268 | 7.3611  | 1.4340 | 0.0479 | 0.5816   |
| 3 | 15 | 5  | 91.5  | 0.0309 | 0.0363 | 0.0572 | 6.6864  | 1.4173 | 0.0449 | 0.7709   |
| 4 | 15 | 5  | 92    | 0.0315 | 0.0145 | 0.0226 | 11.7856 | 0.2767 | 0.0530 | 0.4671   |
| 4 | 15 | 5  | 92    | 0.3543 | 0.3619 | 0.0355 | 6.7846  | 2.4640 | 0.1730 | 3.0842   |
| 4 | 15 | 5  | 92    | 0.3735 | 0.2865 | 0.0410 | 6.7510  | 2.6050 | 0.1214 | 3.2366   |
| 1 | 15 | 6  | 103   | 0.0462 | 0.0537 | 0.0329 | 6.7458  | 0.7977 | 0.0518 | 0.9054   |
| 1 | 15 | 6  | 103   | 0.0306 | 0.0249 | 0.0255 | 11.7346 | 0.8388 | 0.0509 | 0.5224   |
| 1 | 15 | 6  | 103   | 0.2573 | 0.2967 | 0.0403 | 5.7820  | 3.2067 | 0.0480 | 2.3481   |
| 2 | 15 | 6  | 103.4 | 0.0702 | 0.1015 | 0.0448 | 5.7412  | 1.1559 | 0.0449 | 1.5793   |
| 2 | 15 | 6  | 103.4 | 0.3934 | 0.3919 | 0.0554 | 5.6979  | 2.7805 | 0.0490 | 2.7170   |
| 2 | 15 | 6  | 103.4 | 0.0222 | 0.0401 | 0.0651 | 9.6225  | 0.3188 | 0.0429 | 0.4196   |
| 3 | 15 | 6  | 104   | 0.3563 | 0.1889 | 0.0501 | 10.2879 | 2.9718 | 0.0480 | 4.7069   |
| 3 | 15 | 6  | 104   | 0.2197 | 0.3083 | 0.0407 | 7.1721  | 2.5644 | 0.0521 | 3.3836   |
| 3 | 15 | 6  | 104   | 0.5951 | 0.6127 | 0.0725 | 6.2299  | 4.6218 | 0.0556 | 4.6334   |
| 4 | 15 | 6  | 104   | 0.3490 | 0.3918 | 0.0499 | 7.1656  | 3.9345 | 0.0627 | 3.8506   |
| 4 | 15 | 6  | 104   | 0.2471 | 0.3391 | 0.0422 | 4.4464  | 3.1862 | 0.0629 | 2.9287   |
| 4 | 15 | 6  | 104   | 0.0988 | 0.1018 | 0.0266 | 5.6654  | 1.1244 | 0.1553 | 0.6757   |
| 1 | 15 | 7  | 116   | 0.1492 | 0.3020 | 0.0358 | 6.0763  | 1.7076 | 0.0450 | 1.6170   |
| 1 | 15 | 7  | 116   | 0.1403 | 0.1675 | 0.0398 | 11.8778 | 1.4774 | 0.0453 | 2.3149   |
| 1 | 15 | 7  | 116   | 0.1433 | 0.2465 | 0.0314 | 5.7179  | 1.6007 | 0.0544 | 1.5493   |
| 2 | 15 | 7  | 115.8 | 0.4307 | 0.4984 | 0.0711 | 6.8450  | 3.5048 | 0.0498 | 4.6621   |
| 2 | 15 | 7  | 115.8 | 0.1368 | 0.2143 | 0.0853 | 6.8449  | 1.5849 | 0.0493 | 2.0880   |
| 2 | 15 | 7  | 115.8 | 0.6498 | 0.8545 | 0.0637 | 5.5460  | 4.6039 | 0.0537 | 4.7401   |
| 3 | 15 | 7  | 115.6 | 0.6645 | 0.7277 | 0.0583 | 6.1059  | 4.7523 | 0.0617 | 4.2107   |
| 3 | 15 | 7  | 115.6 | 0.6621 | 0.7310 | 0.0746 | 5.1943  | 4.9195 | 0.0575 | 4.1714   |
| 4 | 15 | 7  | 116.3 | 0.3818 | 0.5651 | 0.0400 | 6.8810  | 3.3810 | 0.0586 | 3.7203   |
| 4 | 15 | 7  | 116.3 | 0.4986 | 0.6972 | 0.0468 | 5.8076  | 5.1327 | 0.0626 | 4.9118   |
| 1 | 15 | 8  | 127.3 | 0.5186 | 0.6283 | 0.0862 | 7.1539  | 4.4227 | 0.0805 | 5.5785   |
| 1 | 15 | 8  | 127.3 | 0.4128 | 0.4996 | 0.0546 | 10.8430 | 3.3678 | 0.0587 | 5.5843   |
| 1 | 15 | 8  | 127.3 | 0.2949 | 0.3863 | 0.0525 | 6.3863  | 2.8801 | 0.0561 | 4.1646   |
| 2 | 15 | 8  | 127.2 | 0.8042 | 0.9197 | 0.0641 | 3.8500  | 4.3793 | 0.0624 | 4.0857   |
| 2 | 15 | 8  | 127.2 | 0.9035 | 0.7744 | 0.2370 | 5.9133  | 4.8046 | 0.0555 | 128.2494 |
| 2 | 15 | 8  | 127.2 | 0.4828 | 0.5637 | 0.0599 | 5.9730  | 3.3995 | 0.0485 | 3.7256   |
| 4 | 15 | 8  | 129.5 | 0.5485 | 0.5819 | 0.0865 | NA      | 5.0844 | 0.1147 | 4.9748   |
| 4 | 15 | 8  | 129.5 | 1.1493 | 1.2313 | 0.0557 | 6.6632  | 5.4729 | 0.0640 | 4.6068   |
| 4 | 15 | 8  | 129.5 | 0.5037 | 0.5164 | 0.0744 | 6.5319  | 3.0277 | 0.0630 | 5.1693   |
| 1 | 15 | 9  | 140   | 0.8399 | 0.7318 | 0.3105 | 11.3309 | 4.3715 | 0.0766 | 197.6594 |
| 1 | 15 | 9  | 140   | 0.4565 | 0.4977 | 0.0572 | 10.3751 | 3.2252 | 0.0649 | 5.1455   |
| 1 | 15 | 9  | 140   | 0.7745 | 0.8583 | 0.0772 | 6.6272  | 5.4243 | 0.0830 | 4.3121   |
| 1 | 15 | 10 | 144.1 | 1.2559 | 1.1543 | 0.0967 | 1.7226  | 5.5294 | 0.0846 | 3.9570   |
| 1 | 15 | 10 | 144.1 | 0.8752 | 1.0062 | 0.0606 | 10.8785 | 5.1307 | 0.0679 | 3.0777   |
| 1 | 15 | 10 | 144.1 | 0.4192 | 0.5789 | 0.0504 | 6.0535  | 2.9246 | 0.0608 | 3.4077   |
| 2 | 20 | 1  | 11.4  | 0.0127 | 0.0127 | 0.0888 | 11.5394 | 0.3223 | 0.0332 | 0.2851   |
| 2 | 20 | 1  | 11.4  | 0.0119 | 0.0085 | 0.0563 | 12.6008 | 0.3006 | 0.0380 | 0.2929   |
| 2 | 20 | 1  | 11.4  | 0.0295 | 0.0089 | 0.0541 | 14.5710 | 0.2910 | 0.0378 | 0.3128   |
| 4 | 20 | 1  | 11.9  | NA     | 0.0084 | 0.0282 | 12.7768 | 0.2438 | 0.0455 | 0.2735   |
| 4 | 20 | 1  | 11.9  | 0.0312 | 0.0096 | 0.0385 | 13.1906 | 0.3136 | 0.0472 | 0.3157   |
| 4 | 20 | 1  | 11.9  | 0.0215 | 0.0086 | 0.0343 | 10.9213 | 0.2534 | 0.0448 | 0.2823   |
| 1 | 20 | 2  | 17.3  | 0.0419 | 0.0082 | 0.0251 | 12.3930 | 0.3573 | 0.0426 | 0.2879   |
| 1 | 20 | 2  | 17.3  | NA     | 0.0073 | 0.0381 | 7.7858  | 0.3800 | 0.0437 | 0.3160   |
| 1 | 20 | 2  | 17.3  | 0.0385 | 0.0071 | 0.0272 | 12.0658 | 0.3480 | 0.0404 | 0.2797   |
| 2 | 20 | 2  | 18.5  | NA     | 0.0086 | 0.0429 | 7.1781  | 0.2942 | 0.0357 | 0.3125   |
| 2 | 20 | 2  | 18.5  | NA     | 0.0100 | 0.0531 | 12.4824 | 0.3036 | 0.0368 | 0.2931   |
| 2 | 20 | 2  | 18.5  | NA     | 0.0081 | 0.0540 | 12.5519 | 0.3015 | 0.0366 | 0.2898   |
| 3 | 20 | 2  | 18.5  | 0.1862 | 0.0085 | 0.0352 | 12.2438 | 0.3210 | 0.0402 | 0.2851   |
| 3 | 20 | 2  | 18.5  | 0.1775 | 0.0078 | 0.0246 | 8.1290  | 0.2938 | 0.0368 | 0.2639   |
| 3 | 20 | 2  | 18.5  | NA     | 0.0083 | 0.0327 | 11.4451 | 0.3077 | 0.0400 | 0.2872   |
| 2 | 20 | 3  | 23.6  | 0.0335 | 0.0099 | 0.0455 | 10.8921 | 0.3022 | 0.0385 | 0.3036   |
| 2 | 20 | 3  | 23.6  | 0.0088 | 0.0149 | 0.0843 | 11.7495 | 0.3471 | 0.0389 | 0.2923   |

|   |    |   |      |         |        |        |         |         |        |          |
|---|----|---|------|---------|--------|--------|---------|---------|--------|----------|
| 2 | 20 | 3 | 23.6 | NA      | 0.0097 | 0.0519 | 12.3935 | 0.3073  | 0.0353 | 0.2949   |
| 4 | 20 | 3 | 24.1 | 0.0154  | 0.0082 | 0.0260 | 8.7713  | 0.2430  | 0.0448 | 0.2645   |
| 4 | 20 | 3 | 24.1 | 0.0261  | 0.0081 | 0.0265 | 12.0164 | 0.2419  | 0.0471 | 0.2820   |
| 4 | 20 | 3 | 24.1 | 0.0180  | 0.0072 | 0.0300 | 9.8039  | 0.2538  | 0.0483 | 0.2768   |
| 1 | 20 | 4 | 29   | 0.0439  | 0.0085 | 0.0242 | 11.6462 | 0.3408  | 0.0418 | 0.2784   |
| 1 | 20 | 4 | 29   | NA      | 0.0093 | 0.0299 | 8.1284  | 0.3929  | 0.0468 | 0.2844   |
| 1 | 20 | 4 | 29   | 0.0371  | 0.0076 | 0.0240 | 11.3899 | 0.3450  | 0.0409 | 0.2799   |
| 2 | 20 | 4 | 29.5 | NA      | 0.0105 | 0.0548 | 13.2698 | 0.3364  | 0.0401 | 0.3138   |
| 2 | 20 | 4 | 29.5 | 0.0265  | 0.0093 | 0.0432 | 10.6068 | 0.3014  | 0.0400 | 0.2920   |
| 2 | 20 | 4 | 29.5 | 0.0142  | 0.0098 | 0.0483 | 11.0323 | 0.3376  | 0.0367 | 0.3128   |
| 3 | 20 | 4 | 29.5 | 0.2036  | 0.0085 | 0.0320 | 12.1603 | 0.3448  | 0.0422 | 0.2873   |
| 3 | 20 | 4 | 29.5 | 0.1585  | 0.0073 | 0.0244 | 9.2846  | 0.3118  | 0.0402 | 0.2709   |
| 3 | 20 | 4 | 29.5 | 0.0109  | 0.0079 | 0.0307 | 9.3907  | 0.3342  | 0.0421 | 0.2705   |
| 1 | 20 | 5 | 36.3 | 0.0211  | 0.0222 | 0.0367 | 5.8015  | 1.3715  | 0.0440 | 0.5796   |
| 1 | 20 | 5 | 36.3 | 0.0158  | 0.0073 | 0.0293 | 7.3027  | 0.5971  | 0.0450 | 0.2802   |
| 1 | 20 | 5 | 36.3 | 0.0184  | 0.0106 | 0.0308 | 12.5649 | 0.6057  | 0.0478 | 0.3070   |
| 2 | 20 | 5 | 35.3 | 0.0305  | 0.0093 | 0.0477 | 11.5934 | 0.6849  | 0.0424 | 1.4095   |
| 2 | 20 | 5 | 35.3 | 0.0126  | 0.0151 | 0.0744 | 11.6131 | 0.3811  | 0.0405 | 0.2944   |
| 2 | 20 | 5 | 35.3 | 0.0146  | 0.0128 | 0.0482 | 7.1654  | 0.3673  | 0.0413 | 0.3074   |
| 3 | 20 | 5 | 35.4 | 0.1717  | 0.0157 | 0.0325 | 12.2347 | 0.8548  | 0.0442 | 0.3612   |
| 3 | 20 | 5 | 35.4 | 0.1281  | 0.0082 | 0.0233 | 6.2971  | 0.8449  | 0.0432 | 0.2627   |
| 3 | 20 | 5 | 35.4 | 0.0106  | 0.0091 | 0.0294 | 8.8393  | 0.4341  | 0.0414 | 0.2719   |
| 4 | 20 | 5 | 35.9 | NA      | 0.0111 | 0.0243 | 8.0735  | 0.7817  | 0.0486 | 0.2791   |
| 4 | 20 | 5 | 35.9 | 0.0249  | 0.0087 | 0.0264 | 7.5552  | 0.6259  | 0.0507 | 0.2879   |
| 4 | 20 | 5 | 35.9 | 0.0162  | 0.0089 | 0.0251 | 8.5682  | 0.2940  | 0.0492 | 0.2933   |
| 1 | 20 | 6 | 47   | 0.0604  | 0.0846 | 0.0482 | 7.8642  | 1.1580  | 0.0515 | 1.4114   |
| 1 | 20 | 6 | 47   | 0.2502  | 0.3057 | 0.0552 | 5.7974  | 3.7935  | 0.0519 | 4.9681   |
| 1 | 20 | 6 | 47   | 0.0832  | 0.1098 | 0.0383 | 11.9592 | 1.8794  | 0.0482 | 1.9580   |
| 2 | 20 | 6 | 42.5 | 0.0492  | 0.0707 | 0.0803 | 10.9889 | 1.8437  | 0.0397 | 1.4752   |
| 2 | 20 | 6 | 42.5 | 0.0177  | 0.0167 | 0.0478 | 7.6089  | 0.6357  | 0.0385 | 0.3829   |
| 2 | 20 | 6 | 42.5 | 0.0175  | 0.0244 | 0.0648 | 12.7651 | 1.4962  | 0.0413 | 6.9100   |
| 4 | 20 | 6 | 43   | 0.0784  | 0.0866 | 0.0299 | 11.3839 | 1.9064  | 0.0485 | 1.2769   |
| 4 | 20 | 6 | 43   | 0.0446  | 0.0351 | 0.0312 | 7.3373  | 1.4305  | 0.0522 | 0.8865   |
| 4 | 20 | 6 | 43   | 0.0592  | 0.0683 | 0.0281 | 5.8990  | 1.3221  | 0.0524 | 1.0046   |
| 1 | 20 | 7 | 53   | 0.3511  | 0.3853 | 0.0665 | 6.1392  | 3.2851  | 0.0505 | 4.9935   |
| 1 | 20 | 7 | 53   | 0.2067  | 0.2529 | 0.0552 | 12.5121 | 2.3895  | 0.0531 | 4.6085   |
| 2 | 20 | 7 | 47.5 | 0.2372  | 0.2483 | 0.0587 | 8.3162  | 3.5244  | 0.0456 | 4.3269   |
| 2 | 20 | 7 | 47.5 | 0.1028  | 0.1154 | 0.0621 | 7.6389  | 1.7987  | 0.0436 | 2.2235   |
| 2 | 20 | 7 | 47.5 | 0.0907  | 0.1144 | 0.0819 | 10.2842 | 1.5477  | 0.0390 | 1.9541   |
| 3 | 20 | 7 | 47.4 | 0.2855  | 0.1350 | 0.0373 | 10.2084 | 1.9266  | 0.0448 | 2.0175   |
| 3 | 20 | 7 | 47.4 | 0.2684  | 0.1246 | 0.0380 | 6.5516  | 3.0910  | 0.0410 | 2.6644   |
| 3 | 20 | 7 | 47.4 | 0.1513  | 0.1610 | 0.0494 | 5.7102  | 2.5465  | 0.0407 | 2.3963   |
| 4 | 20 | 7 | 48.3 | 0.6597  | 0.8294 | 0.0815 | 6.7328  | 5.5371  | 0.0669 | 3.6739   |
| 4 | 20 | 7 | 48.3 | 0.2152  | 0.2559 | 0.0345 | 11.8902 | 2.6083  | 0.0419 | 2.9855   |
| 4 | 20 | 7 | 48.3 | 0.1174  | 0.1590 | 0.0320 | 5.5954  | 2.4950  | 0.0457 | 2.2409   |
| 1 | 20 | 8 | 59   | 0.4480  | 0.5404 | 0.0688 | 5.7273  | 3.5361  | 0.0542 | 6.0698   |
| 1 | 20 | 8 | 59   | 0.5188  | 0.5863 | 0.0987 | 7.8590  | 4.9634  | 0.0667 | 4.8165   |
| 1 | 20 | 8 | 59   | 12.2790 | 7.4238 | 1.4679 | 9.8854  | 37.9358 | 0.0642 | 35.3954  |
| 2 | 20 | 8 | 77.5 | 0.2789  | 0.2543 | 0.0773 | 2.0928  | 3.0972  | 0.0427 | 3.8198   |
| 2 | 20 | 8 | 77.5 | 0.4902  | 0.4394 | 0.0922 | 6.4054  | 3.4157  | 0.0534 | 4.5210   |
| 2 | 20 | 8 | 77.5 | 0.7866  | 0.9851 | 0.4302 | 12.1142 | 5.5637  | 0.0566 | 319.0682 |
| 3 | 20 | 8 | 53.5 | 0.5036  | 0.3997 | 0.0596 | 11.7776 | 3.6616  | 0.0474 | 5.3201   |
| 3 | 20 | 8 | 53.5 | 0.2549  | 0.2856 | 0.0508 | 7.5768  | 3.4193  | 0.0504 | 3.9775   |
| 3 | 20 | 8 | 53.5 | 0.1751  | 0.2028 | 0.0708 | 7.4095  | 2.6954  | 0.0471 | 4.0361   |
| 4 | 20 | 8 | 54   | 0.1090  | 0.1639 | 0.0354 | 8.6488  | 1.3535  | 0.0519 | 1.5819   |
| 4 | 20 | 8 | 54   | 0.5890  | 0.6983 | 0.0611 | 4.5769  | 5.0459  | 0.0562 | 5.2401   |
| 4 | 20 | 8 | 54   | 0.5504  | 0.5387 | 0.0655 | 5.7853  | 4.2233  | 0.0504 | 5.2311   |
| 1 | 20 | 9 | 66   | 0.6342  | 0.8056 | 0.0859 | 6.9291  | 4.8687  | 0.0696 | 5.6262   |
| 1 | 20 | 9 | 66   | 4.8121  | 6.3486 | 1.8982 | 10.2057 | 22.4674 | 0.0556 | 7.6803   |
| 1 | 20 | 9 | 66   | 0.7738  | 0.8228 | 0.0921 | NA      | 5.1963  | 0.0758 | 4.6374   |
| 3 | 20 | 9 | 59.4 | 0.6888  | 0.5725 | 0.0706 | 6.1571  | 4.4887  | 0.0548 | 5.4438   |
| 3 | 20 | 9 | 59.4 | 0.6268  | 0.7915 | 0.0837 | 7.0302  | 5.0949  | 0.0636 | 5.0043   |
| 3 | 20 | 9 | 59.4 | 0.3353  | 0.4106 | 0.0864 | 8.5735  | 3.3133  | 0.0503 | 6.2832   |

|   |    |    |      |        |        |        |        |        |        |        |
|---|----|----|------|--------|--------|--------|--------|--------|--------|--------|
| 4 | 20 | 9  | 60.3 | 0.5084 | 0.5232 | 0.0622 | 6.5614 | 4.0555 | 0.0590 | 5.7420 |
| 4 | 20 | 9  | 60.3 | 0.6781 | 0.7194 | 0.0771 | 1.5689 | 5.0935 | 0.0576 | 4.6931 |
| 4 | 20 | 9  | 60.3 | 0.4085 | 0.5913 | 0.0552 | 6.3420 | 3.9224 | 0.0605 | 4.6255 |
| 1 | 20 | 10 | 71.2 | 0.8892 | 0.9500 | 0.0733 | 5.8336 | 4.6132 | 0.0596 | 5.9420 |
| 1 | 20 | 10 | 71.2 | 0.6626 | 0.6897 | 0.0935 | 2.6948 | 4.5263 | 0.0860 | 5.2718 |
| 1 | 20 | 10 | 71.2 | 0.5641 | 0.6261 | 0.0832 | 2.1030 | 3.9678 | 0.0709 | 5.1398 |
| 3 | 20 | 10 | 66.5 | 0.9638 | 0.6661 | 0.0915 | 2.7819 | 3.8258 | 0.0698 | 5.4741 |
| 3 | 20 | 10 | 66.5 | 0.6063 | 0.5134 | 0.0971 | 5.7452 | 4.0224 | 0.0538 | 5.0846 |
| 3 | 20 | 10 | 66.5 | 0.6202 | 0.7386 | 0.1035 | 7.2449 | 5.2542 | 0.0937 | 5.3980 |
